## 20 **Abstract**

21 Initial attachment to a surface is a key and highly regulated step in biofilm  
22 formation. In this study, we present a platform for reversibly functionalizing bacterial cell  
23 surfaces, with an emphasis on designing biofilms. We engineered the Lap system of  
24 *Pseudomonas fluorescens* Pf0-1, which is normally used to regulate initial cell surface  
25 attachment, to display various protein cargo at the bacterial cell surface and control  
26 extracellular release of the cargo in response to changing levels of the second messenger c-  
27 di-GMP. To accomplish this goal, we fused the protein cargo between the N-terminal  
28 retention module and C-terminal secretion signal of LapA, and controlled surface  
29 localization of the cargo with natural signals known to stimulate or deplete c-di-GMP levels  
30 in *P. fluorescens* Pf0-1. We show this system can tolerate large cargo in excess of 500 amino  
31 acids, direct *P. fluorescens* Pf0-1 to surfaces it does not typically colonize, and program this  
32 microbe to sequester the toxic metal cadmium.

33

## 34 **Text**

35 The bacterial biofilm lifestyle is profoundly consequential to human health and  
36 industry. Although the concerning link between biofilm formation and increased antibiotic  
37 tolerance has been known for some time (1, 2), only recently have the benefits of some  
38 surface-attached communities become appreciated. Such beneficial roles include  
39 competitively excluding pathogen colonization (3), bioelectricity generation (4), and  
40 enhancing bioleaching (5, 6). Furthermore, recent microbiome research cataloging various  
41 beneficial relationships between bacterial biofilms and their human host has caused a  
42 paradigm shift from the desire to inhibit biofilm formation towards also designing biofilms

43 for therapeutic purposes (7). One goal of synthetic biology is to program bacterial cell  
44 surfaces to perform customized functions under an exclusive set of environmental  
45 conditions, such as binding a defined surface or remediating a toxic metal from an  
46 environment.

47         The first stage of biofilm formation is when a bacterium makes initial contact with a  
48 substratum while later stages are focused on reinforcing the biofilm matrix after  
49 committing to a surface. To establish a biofilm, many bacteria employ surface-associated  
50 adhesins to initially bind a surface (8–10) and subsequently secrete adhesins, small  
51 amyloid proteins and/or complex exopolysaccharides to “glue” the bacteria together within  
52 the biofilm (11, 12). Synthetic biologists have exploited strategies for manipulating these  
53 two stages of biofilm formation; however, many of these biofilm engineering tools are  
54 restricted to displaying relatively small protein domains. To promote initial contact,  
55 bacterial surfaces have been modified to display surface tags (13), light-responsive  
56 amphiphiles (14), photoswitchable proteins (15), and photoswitchable azobenzene linkers  
57 (16). Likewise the small, self-assembling amyloid protein CsgA of *E. coli* has been  
58 functionalized for nanoparticle templating as well as mercury bioremediation (17, 18).  
59 However, these strategies are often unable to accommodate large domains (>60 aa),  
60 limiting their versatility and thus downstream applications. Interestingly, exploiting the  
61 natural bacterial decision-making process to tune initial attachment and biofilm formation  
62 has also been largely overlooked, with researchers favoring synthetic, UV light- or blue  
63 light-oriented strategies.

64         Here, we describe a new approach for reversibly customizing the bacterial cell  
65 surface using the Lap system of *P. fluorescens* Pf0-1, which is naturally used to promote

66 initial attachment and thus biofilm formation by a variety of microbes (19). The Lap system  
67 was recently characterized as a novel subgroup of T1SS transporters and substrates (20).  
68 This system is comprised of 3 components: a type 1 secretion system (T1SS) apparatus  
69 (LapEBC), a giant adhesin (LapA), and an inside-out regulatory component (LapGD) that  
70 controls levels of LapA at the cell surface in response to the second messenger c-di-GMP  
71 (Figure 1). LapA is a ~520 kDa adhesin with extensive internal repeats that are sandwiched  
72 between an N-terminal retention module and C-terminal secretion signal (20, 21). The level  
73 of surface-associated LapA corresponds with cellular c-di-GMP concentrations, allowing  
74 rapid, tunable changes in biofilm assembly and disassembly (22). The inner membrane-  
75 bound c-di-GMP receptor, LapD, controls the activity of the periplasmic LapA-targeting  
76 protease, LapG. LapG cleaves LapA at a characterized dialanine site; however, when bound  
77 to c-di-GMP, LapD sequesters LapG to protect LapA, and thereby promote LapA surface  
78 localization and thus biofilm formation (23, 24).

79 To develop the Lap system as a platform for customizing the *P. fluorescens* Pf0-1 cell  
80 surface, we sought to first delete the gene encoding the giant adhesin, *lapA*, then use the  
81 regions critical for LapA cell surface localization (20) and secretion (21) to deliver and  
82 control cell surface release of different cargo proteins of interest. We have previously  
83 shown a 3XHA epitope tag N-terminally fused to LapA's C-terminal secretion signal (pC235,  
84 5012M-5246S; Figure 2A,B) is secreted directly into the supernatant independent of LapG  
85 activity (20). To determine if LapA's N-terminal domain (1M-272I) is sufficient to display  
86 the 3XHA-tagged secretion signal of LapA at the cell surface, we fused this N-terminal  
87 region to C235 to generate the pN272 construct (pN272; Figure 2A). The pC235 and  
88 pN272 constructs were then expressed in the *lapA* and *lapAlapG* mutant backgrounds and

89 assayed for cell surface localization and LapG-dependent release into the extracellular  
90 environment. Here, the *lapA* mutant has a functional LapG protease capable of cleaving the  
91 N-terminal retention module of LapA (see Figure 1) while the *lapAlapG* mutant lacks the  
92 protease and thus the retention module of LapA remains intact and functional. We  
93 predicted the N272 fusion protein, despite containing only ~10% of the full-length LapA  
94 protein, should localize to the cell surface and require LapG proteolysis for release into the  
95 supernatant similarly to the full-length LapA.

96 Western blot analysis indicated the N272 fusion is displayed at the cell surface  
97 (Figure 2B, cell surface). Furthermore, consistent with previous studies with full-length  
98 LapA (25), extracellular release of N272 requires LapG proteolysis, as indicated by  
99 comparing the molecular weight of N272 in the whole cell (WC, intact N272, #) and  
100 supernatant fractions (S, proteolyzed N272, ##) when LapG is absent (-) or present (+)  
101 (Figure 2B, bottom, far right). Conversely, control strains expressing LapA's 3XHA-tagged  
102 secretion signal demonstrate this variant lacking LapA's retention module is unable to  
103 associate with the surface and is secreted directly into the extracellular environment  
104 independent of LapG activity (Figure 2B, p235, middle, \*).

105 Cell surface levels of LapA can be tuned by modulating cellular levels of c-di-GMP or  
106 by inhibiting the proteolytic activity of the calcium-dependent protease, LapG. Phosphate  
107 robustly stimulates c-di-GMP production in *P. fluorescens* Pf0-1 while phosphate-limiting  
108 conditions activate the Pho regulon, leading to transcriptional activation of the  
109 phosphodiesterase RapA and depletion of c-di-GMP levels, thus decreasing LapA at the cell  
110 surface and reducing biofilm formation (26). Alternatively, LapG, a calcium-dependent  
111 protease, can be chemically inhibited with micromolar amounts of calcium chelators such

112 as EGTA or citrate, leading to LapA retention and biofilm formation independently of c-di-  
113 GMP (27). We took advantage of this knowledge to determine if we could control release of  
114 the pN272 construct into the supernatant. The *lapA* mutant expressing pN272 was grown  
115 in a high phosphate medium supplemented with the calcium chelator 0.2% citrate to  
116 discourage LapG proteolysis. This LapG-inhibiting medium was then exchanged with the  
117 same base medium, except depleted for phosphate and lacking citrate, both of which  
118 stimulate LapG activity. Cleaved N272 in the supernatant fraction was then monitored for  
119 30 minutes. Western blot analysis indicates LapG activation enriches the supernatant  
120 fraction with cleaved N272 peptide within 15 minutes, illustrating the rapid  
121 responsiveness of this system (Figure 2C).

122         Given that LapA naturally contains an extensive and complex domain architecture,  
123 we hypothesized this LapA-based platform could be utilized to reversibly display various  
124 protein cargo on the bacterial cell surface. To test this idea, we cloned several cargo  
125 proteins into the N272 system, as shown in Figure 2A. We then assayed for LapG-  
126 dependent, cell-surface release of the cargo to determine if this platform could be applied  
127 to differentially functionalize the *P. fluorescens* Pf0-1 cell surface. The spectrum of cargo  
128 tested ranged from a cytoplasmic Heavy-Metal Associated domain (the HMA from the ABC  
129 transporter CadA of *Listeria*), to a protease secreted by a Gram-positive bacterium  
130 (subtilisin E of *Bacillus subtilis*), as well as the fluorescent protein tdTomato and small  
131 epitope tags (3XHA and 2X Strep-tactin) (Figure 2A). Notably, all of the cargo tested was  
132 displayed at the cell surface and released in response to LapG activity (Figure 3); however  
133 Western analysis of the whole cell fraction indicated some variability in cargo stability  
134 (Figure 3, pN272-SubE-HA vs pN272-HA-tdTomato). The breadth of cargo size successfully

135 displayed and release from the *P. fluorescens* Pf0-1 cell surface suggests this system can  
136 tolerate large, multifunctional cargo and can display proteins and domains of cytoplasmic  
137 or extracellular origin.

138         Because the *lapA* mutant does not form a biofilm under our laboratory conditions,  
139 we next asked if a cargo displayed at the cell surface in the pN272 variants could direct *P.*  
140 *fluorescens* Pf0-1 to bind a surface of interest. To test this idea, we performed a competitive  
141 binding assay with *lapA* mutants expressing either empty vector or pN272-SubE-HA mixed  
142 at a 1:1 ratio. The cell mixture (input) was applied to protein G magnetic beads bound to  
143  $\alpha$ HA anti-body to determine if presentation of the HA epitope conferred selective binding  
144 to the functionalized beads. After a short incubation period, the resin-bound bacteria were  
145 isolated from the mixture with a magnet and the free-floating population was collected and  
146 characterized (Figure 3, right). While the input contained equal numbers of binding to non-  
147 binding cells, the output, which represents cells that could not bind the functionalized  
148 beads, was almost exclusively binding-defective cells expressing the empty vector (Figure  
149 4, right). These data suggest the Lap system may be utilized to direct *P. fluorescens* to  
150 functionalized or novel surfaces for various biotechnological applications.

151         Designing microbes for bioremediation purposes is also of immense interest to  
152 synthetic biologists. Thus, we next wanted to ask if the Lap system could be used to design  
153 *P. fluorescens* Pf0-1, a natural plant symbiont, to bind the heavy-metal cadmium, which is  
154 highly toxic to plants. To test this idea, we expressed the cytoplasmic cadmium-binding  
155 HMA domain from the P1-type ATPase CadA of *L. monocytogenes* (28) in our N272 system  
156 (Figure 2A, pN272-HA-HMA ) and assayed for cadmium binding. We used ICP-MS to  
157 compare cellular cadmium levels between the *P. fluorescens* Pf0-1 *lapAlapG* mutant

158 expressing pN272-HA-HMA or empty vector (pMQ72) after being exposed to 12  $\mu$ M  
159 cadmium sulfate ( $\text{CdSO}_4$ ) for 30 minutes. The modest, but statistically significant increase  
160 in bound cadmium suggests the cytoplasmic HMA domain is functional when displayed at  
161 the *P. fluorescens* Pf0-1 cell surface. These data are consistent with the HMA domain  
162 sequestering cadmium, suggesting the Lap system may be engineered for bioremediation  
163 purposes.

164 In summary, we present a platform to customizing bacterial cell surfaces using the  
165 Lap system from *P. fluorescens* Pf0-1 and demonstrate its usefulness in biofilm design and  
166 bioremediation. Like most T1SS, the Lap system can accommodate large protein cargo  
167 unsuitable for other cell-surface display platforms, expanding potential downstream  
168 applications of this system. The customized cargo displayed at the cell surface can be tuned  
169 by modulating levels of the secondary messenger c-di-GMP or through chemical inhibition  
170 of the calcium-dependent protease LapG, allowing rapid, controlled biofilm assembly and  
171 disassembly. Together, these features make the Lap system an attractive platform for  
172 functionalizing the bacterial cell surface. Although we have demonstrated this proof of  
173 concept in *P. fluorescens* Pf0-1, various Gram-negative bacteria encode the T1SS (19)  
174 suggesting it may be optimized to reversibly functionalize the cell surface of various Gram-  
175 negative bacteria.

176

## 177 **Materials and Methods**

178 **Plasmids, Bacterial Strains, and Growth Conditions.** The plasmid pMQ72 (29) was used  
179 as the backbone for all the constructs engineered for this study. The N-terminus and C-  
180 terminus of LapA were PCR amplified from WT *P. fluorescens* Pf0-1. The Strep-Tactin and



181 CadA-HMA domain from *L. monocytogenes* DNA sequences were ordered from IDT. The  
182 gene coding for subtilisin E was cloned from *Bacillus subtilis* 168. The pRSF-Duet plasmid  
183 was a gift from Prof. Holger Sondermann. Plasmid carrying tdTomato was a gift from Prof.  
184 Deb Hogan. S17 *E. coli* was purchased from Life Technologies. The *P. fluorescens lapA* and  
185 *lapAlapG* clean deletion mutant strains, described previously (20), carrying pMQ72-based  
186 plasmid were grown overnight in LB + 30µg/mL Gentamycin and subcultured with rotation  
187 in K10T-1 (30) for 6 hours unless noted otherwise.

188

189 **Cloning of pN272 Cargo.** Yeast cloning was used to fuse cargo with LapA N- and C-  
190 terminal elements into pMQ72. The N- and C- terminus of LapA was amplified using PCR  
191 primers designed with ends homologous to *SmaI* digested pMQ72 to orient insertion. Each  
192 cargo was amplified with PCR primers designed with ends homologous to either the 3' end  
193 of LapA's N-terminus or 5' end of LapA's C-terminus to orient insertion.

194

195 **Western Blot Analysis.** Standard practices for Western blot analysis and cell-surface LapA  
196 detection were used to detect the 3XHA or 6XHIS epitopes engineered into the pN272-  
197 based constructs, as reported (21). For whole cell analysis, cells were normalized and  
198 resuspended in 1X SDS-page loading buffer. For supernatant analysis, the supernatants  
199 were concentrated in Amicon centrifugal 4 mL 30K NMWL spin columns (Millipore Cat.  
200 #UFC803096) and protein levels normalized following protein quantification using the  
201 Pierce BCA assay kit (Thermo #23227).

202

203 **Competitive Binding Assay.** *P. fluorescens lapA* mutants were subcultured in K10T-1 +

204 0.4% sodium citrate (Fisher, Cat. No. S279-500) to inhibit LapG activity, normalized, and  
205 applied to Pierce Protein G Magnetic Resin (Cat #88847) prepared and pre-incubated with  
206 1 µg a-HA anti-body (BioLegend #901503) according to the manufacture's suggestions.  
207 Cells were incubated with anti-body bound magnetic resin at room temperature for 1 hr.  
208 The resin-bound fraction was separated with a magnet, and then the medium fraction  
209 containing the unbound bacteria was plated. Colony PCR was used to enumerate cells  
210 carrying pN272-SubE-HA and empty vector (pMQ72).

211  
212 **Cadmium Binding.** *P. fluorescens lapAlapG* mutants expressing pN272-HA-HMA or empty  
213 vector (pMQ72) were subcultured for 5.5 hours and exposed to 10µM Cadmium sulfate  
214 (Fisher Cat. # C19-500) for 30 min. To prepare for ICP-MS analysis, the dry cell pellets were  
215 weighed and resuspended in 25mM Tris pH7.4, then boiled for 20 min at 100°C. The cell  
216 debris was removed with centrifugation and the lysate submitted for analysis.

217  
218 **Acknowledgement.** This work was funded by supported by NIH grant R01GM123609 (to  
219 H.S. and G.A.O.). We thank M.L. Guerinot for assistance in designing the metal binding  
220 cargo. Metal analysis was performed by the Trace Elements Analysis Core, supported  
221 by NIH/NIEHS P42 ES007373 and NIH/NCI P30CA023108.

222  
223 **References**

- 224 1. Nickel JC, Wright JB, Ruseska I, Marrie TJ, Whitfield C, Costerton JW. 1985. Antibiotic  
225 resistance of *Pseudomonas aeruginosa* colonizing a urinary catheter in vitro. Eur J  
226 Clin Microbiol 4:213–218.

- 227 2. Nickel JC, Ruseska I, Wright JB, Costerton JW. 1985. Tobramycin resistance of  
228 *Pseudomonas aeruginosa* cells growing as a biofilm on urinary catheter material.  
229 Antimicrob Agents Chemother 27:619–624.
- 230 3. Wilson KH, Perini F. 1988. Role of competition for nutrients in suppression of  
231 *Clostridium difficile* by the colonic microflora. Infect Immun 56:2610–2614.
- 232 4. Liu T, Yu YY, Deng XP, Ng CK, Cao B, Wang JY, Rice SA, Kjelleberg S, Song H. 2015.  
233 Enhanced *Shewanella biofilm* promotes bioelectricity generation. Biotechnol Bioeng  
234 112:2051–2059.
- 235 5. Castro L, Blázquez ML, González F, Muñoz JA, Ballester A. 2017. Hydrometallurgy  
236 Anaerobic bioleaching of jarosites by *Shewanella putrefaciens*, influence of chelators  
237 and biofilm formation 168:56–63.
- 238 6. Ossa Henao DM, Vicentini R, Rodrigues VD, Bevilaqua D, Ottoboni LMM. 2014.  
239 Differential gene expression in *Acidithiobacillus ferrooxidans* LR planktonic and  
240 attached cells in the presence of chalcopyrite. J Basic Microbiol 1–8.
- 241 7. Mathipa MG, Thantsha MS. 2017. Probiotic engineering: Towards development of  
242 robust probiotic strains with enhanced functional properties and for targeted control  
243 of enteric pathogens. Gut Pathog 9:1–17.
- 244 8. Barlag B, Hensel M. 2015. The giant adhesin SiiE of *Salmonella enterica*. Molecules  
245 20:1134–1150.
- 246 9. Syed KA, Beyhan S, Correa N, Queen J, Liu J, Peng F, Satchell KJF, Yildiz F, Klose KE.  
247 2009. The *Vibrio cholerae* flagellar regulatory hierarchy controls expression of  
248 virulence factors. J Bacteriol 191:6555–6570.
- 249 10. Yoshida K, Toyofuku M, Obana N, Nomura N. 2017. Biofilm formation by *Paracoccus*

- 250 *denitrificans* requires a type I secretion system-dependent adhesin BapA. FEMS  
251 Microbiol Lett 364:1–7.
- 252 11. Borlee BR, Goldman AD, Murakami K, Samudrala R, Wozniak DJ, Parsek MR. 2010.  
253 *Pseudomonas aeruginosa* uses a cyclic-di-GMP-regulated adhesin to reinforce the  
254 biofilm extracellular matrix. Mol Microbiol 75:827–842.
- 255 12. Giglio KM, Fong JC, Yildiz FH, Sondermann H. 2013. Structural basis for biofilm  
256 formation via the *Vibrio cholerae* matrix protein RbmA. J Bacteriol 195:3277–3286.
- 257 13. Zhang R, Heyde KC, Scott FY, Paek SH, Ruder WC. 2016. Programming surface  
258 chemistry with engineered cells. ACS Synth Biol 5:936–941.
- 259 14. Hu Y, Zou W, Julita V, Ramanathan R, Tabor RF, Nixon-Luke R, Bryant G, Bansal V,  
260 Wilkinson BL. 2016. Photomodulation of bacterial growth and biofilm formation  
261 using carbohydrate-based surfactants. Chem Sci 7:6628–6634.
- 262 15. Chen F, Wegner S V. 2017. Blue light switchable bacterial adhesion as a key step  
263 toward the design of biofilms. ACS Synth Biol 6:2170–2174.
- 264 16. Weber T, Chrasekaran V, Stamer I, Thygesen MB, Terfort A, Lindhorst TK. 2014.  
265 Switching of bacterial adhesion to a glycosylated surface by reversible reorientation  
266 of the carbohydrate ligand. Angew Chemie - Int Ed 53:14583–14586.
- 267 17. Nguyen PQ, Botyanszki Z, Tay PKR, Joshi NS. 2014. Programmable biofilm-based  
268 materials from engineered curli nanofibres. Nat Commun 5:1–10.
- 269 18. Tay PKR, Nguyen PQ, Joshi NS. 2017. A synthetic circuit for mercury bioremediation  
270 using self-assembling functional amyloids. ACS Synth Biol 6:1841–1850.
- 271 19. Smith TJ, Sondermann H, O’Toole GA. 2018. Type 1 does the two-step: Type 1  
272 secretion substrates with a functional periplasmic intermediate. 200:e00168-18.

- 273 20. Smith TJ, Font ME, Kelly CM, Sondermann H, O'Toole GA. 2018. An N-terminal  
274 retention module anchors the giant adhesin LapA of *Pseudomonas fluorescens* at the  
275 cell surface: a novel sub-family of type I secretion systems. J Bacteriol JB.00734-17.
- 276 21. Boyd CD, Smith TJ, El-Kirat-Chatel S, Newell PD, Dufrêne YF, O'Toole GA. 2014.  
277 Structural features of the *Pseudomonas fluorescens* biofilm adhesin LapA required for  
278 LapG-dependent cleavage, biofilm formation, and cell surface localization. J Bacteriol  
279 196:2775–2788.
- 280 22. Newell PD, Monds RD, O'Toole GA. 2009. LapD is a bis-(3',5')-cyclic dimeric GMP-  
281 binding protein that regulates surface attachment by *Pseudomonas fluorescens* Pf0-1.  
282 Proc Natl Acad Sci U S A 106:3461–6.
- 283 23. Navarro MVAS, Newell PD, Krasteva P V., Chatterjee D, Madden DR, O'Toole  
284 GA, Sondermann H. 2011. Structural basis for c-di-GMP-mediated inside-out  
285 signaling controlling periplasmic proteolysis. PLoS Biol 9:e1000588.
- 286 24. Chatterjee D, Cooley RB, Boyd CD, Mehl RA, O'Toole GA, Sondermann H. 2014.  
287 Mechanistic insight into the conserved allosteric regulation of periplasmic  
288 proteolysis by the signaling molecule cyclic-di-GMP. Elife 3:e03650.
- 289 25. Newell PD, Boyd CD, Sondermann H, O'Toole GA. 2011. A c-di-GMP effector system  
290 controls cell adhesion by inside-out signaling and surface protein cleavage. PLoS Biol  
291 9:e1000587.
- 292 26. Monds RD, Newell PD, Gross RH, O'Toole GA. 2007. Phosphate-dependent  
293 modulation of c-di-GMP levels regulates *Pseudomonas fluorescens* Pf0-1 biofilm  
294 formation by controlling secretion of the adhesin LapA. Mol Microbiol 63:656–679.
- 295 27. Boyd CD, Chatterjee D, Sondermann H, O'Toole GA. 2012. LapG, required for

- 296 modulating biofilm formation by *Pseudomonas fluorescens* Pf0-1, is a calcium-  
297 dependent protease. J Bacteriol 194:4406–4414.
- 298 28. Banci L, Bertini I, Ciofi-Baffoni S, Su XC, Miras R, Bal N, Mintz E, Catty P, Shokes JE,  
299 Scott RA. 2006. Structural basis for metal binding specificity: The N-terminal  
300 cadmium binding domain of the P1-type ATPase CadA. J Mol Biol 356:638–650.
- 301 29. Shanks RMQ, Caiazza NC, Hinsä SM, Toutain CM, O'Toole G a. 2006. *Saccharomyces*  
302 *cerevisiae*-based molecular tool kit for manipulation of genes from Gram-negative  
303 bacteria. Appl Environ Microbiol 72:5027–36.
- 304 30. Newell PD, Yoshioka S, Hvorecny KL, Monds RD, O'Toole G a. 2011. Systematic  
305 analysis of diguanylate cyclases that promote biofilm formation by *Pseudomonas*  
306 *fluorescens* Pf0-1. J Bacteriol 193:4685–98.

307

308

309

310 **Figure 1. Lap system diagram**

311

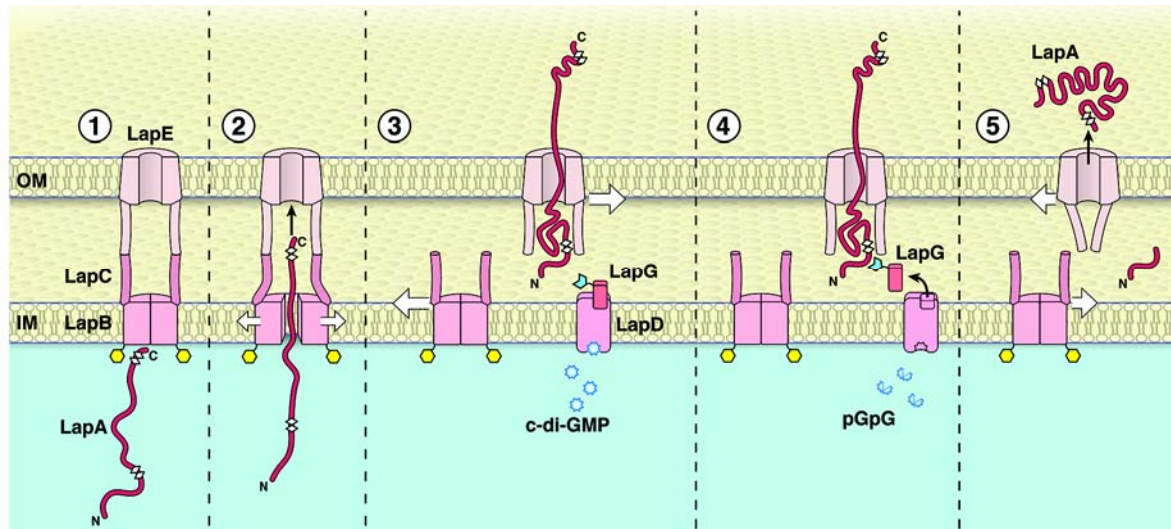

312 **Figure 1. Model of the LapA adhesion system.** The C-terminal domain of LapA includes  
313 the secretion signal, which engages the T1SS (panel 1). LapA is secreted C-terminal end  
314 first (panel 2), and when c-di-GMP levels are high the N-terminal retention domain anchors  
315 LapA to the cell surface via retention in the outer membrane component of the T1SS (panel  
316 3). If c-di-GMP levels fall, the LapG protease is released from the LapD receptor and LapG is  
317 free to cleave the N-terminal retention domain of LapA (panel 4). The LapA lacking the N-  
318 terminal domain is release from the cell surface (panel). A portion of this figure was  
319 published previously (20). Figure copyright William Scavone, 2018. Used with permission.

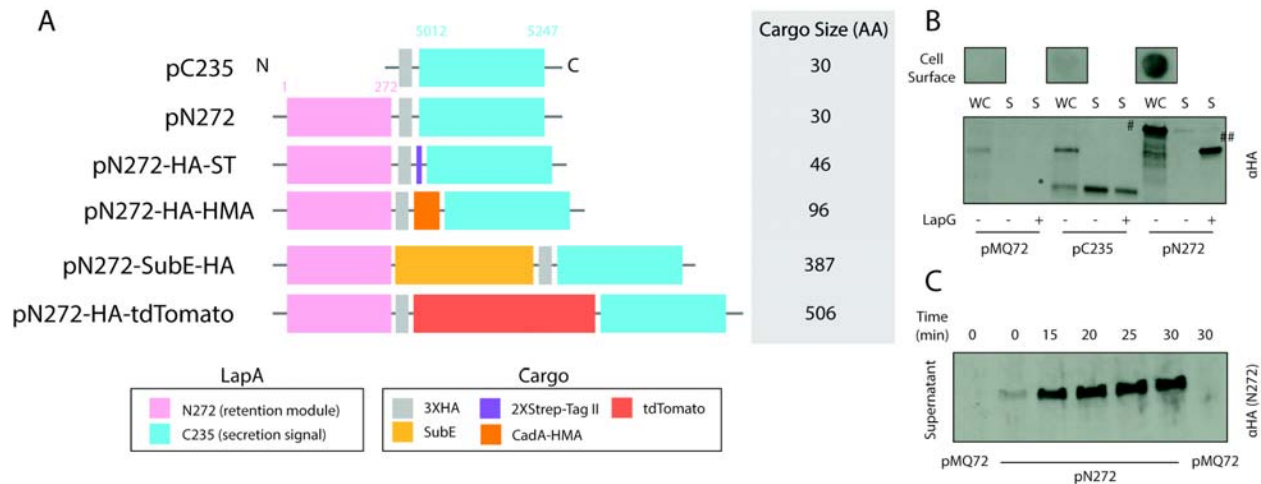

320

321

322 **Figure 2.** (A) Schematic representation of N272 variants described in this study. The  
 323 legend indicates the various domains in each construct. The C-terminal domain of LapA  
 324 (light blue) contains the secretion signal, and is common to all constructs. The pink domain  
 325 is the “retention module” of LapA and is required to anchor LapA to the cell surface (see  
 326 Figure 1). (B) Cell surface association and regulation of the N272 construct requires the N-  
 327 terminal retention module. Cell surface, whole cell (WC), and supernatant (S) levels of the  
 328 indicated proteins after subculturing for 6 hr. The presence (+) of absence (-) of LapG in the  
 329 strain is indicated. (C) Controlled extracellular release of surface associated N272 in  
 330 response to phosphate starvation and removal of the calcium chelator. Strains were  
 331 subcultured for 5.5 hr in a LapG-inhibiting medium (0 min), the medium was replaced with  
 332 a LapG-activating medium and the supernatant sampled over 30 min for the presence of  
 333 cleaved N272.

334

335

336



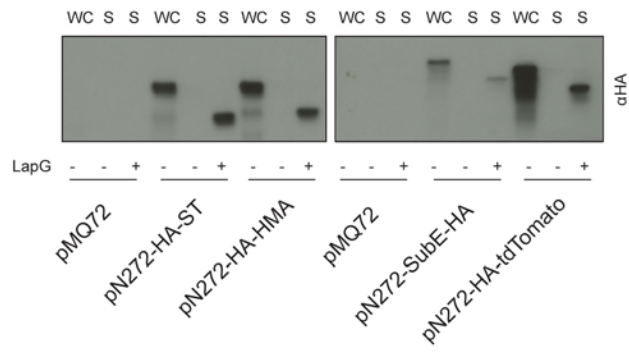

337

338

339 **Figure 3.** Extracellular release of cargo requires LapG activity. Western blot analysis of the

340 whole cell (WC) and supernatant (S) fractions from the *lapA* mutant (LapG, +) and the

341 *lapAlapG* mutant (LapG, -) mutant strains expressing the indicated constructs.

342

343

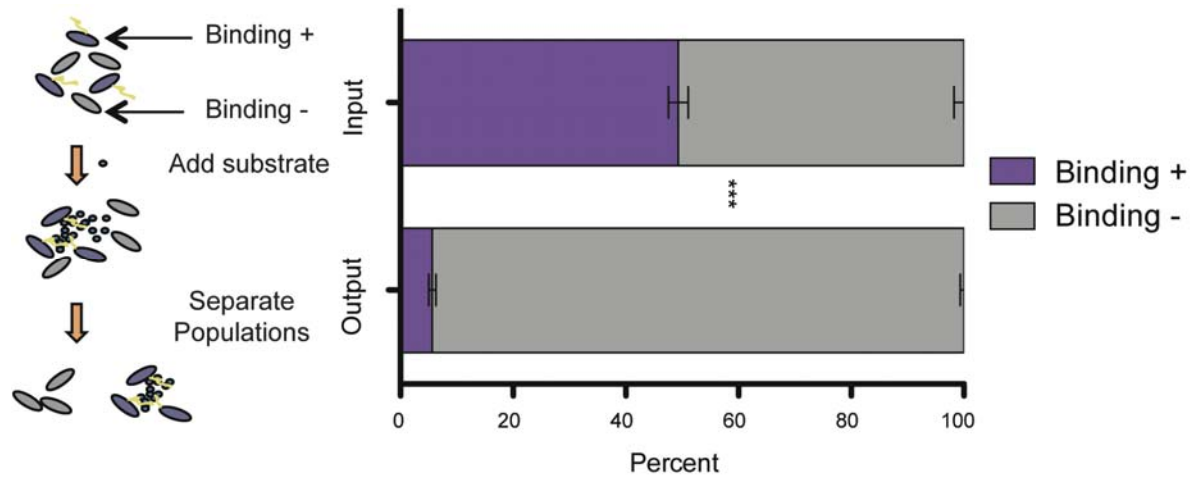

344

345 **Figure 4.** Competitive binding assay (outlined on left) between *P. fluorescens* Pf0-1 *lapA*  
346 mutants expressing pN272-SubE-HA (binding-positive) or empty vector (binding-  
347 negative). The two strains were mixed at a 1:1 ratio (input) then incubated with  $\alpha$ HA  
348 antibody-bound protein G magnetic resin. Cells bound to the resin were removed from the  
349 mixture using a magnet, and the supernatant fraction with unbound cells collected  
350 (output). Cells from the input and output were plated. Colony PCR was performed on 100  
351 random colonies from the input and output to enumerate cells carrying empty vector  
352 (pMQ72) or pN272-SubE-HA. Error bars are SEM of three biological replicates. Two-way  
353 ANOVA statistical analysis was performed (\*\*\*,  $p < 0.0001$ ).

354

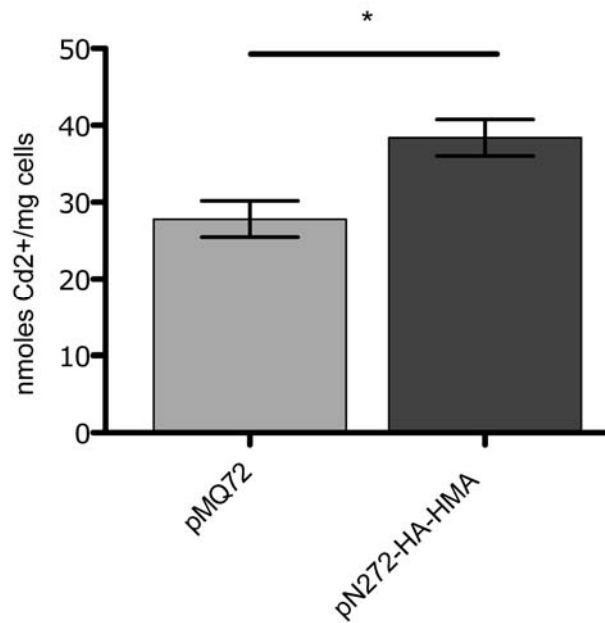

355

356 **Figure 5.** *P. fluorescens* Pf0-1 displaying the HMA domain from CadA of *L. monocytogenes*  
357 show increased cadmium binding. The *P. fluorescens* Pf0-1 *lapAlapG* mutant expressing the  
358 indicated plasmids were subcultured for 5.5 hr and then exposed to 10  $\mu$ M Cadmium  
359 sulfate for 30 minutes. Weighed cell pellets were resuspended in equal volume of buffer  
360 and lysed. Cadmium levels were determined using ICP-MS. Error bars are SEM of three  
361 biological replicates. Two-tailed t-test was performed (\*,  $p < 0.05$ ).

362
